# Supplementary material for: Unsupervised changes in core object recognition behavior are predicted by neural plasticity in inferior temporal cortex
Source: eLife journal article supplement (doi:10.7554/elife.60830), 2021-06-11
Supplement: supp [file elife-60830-supp-v2.zip]

Archive with 4 entries (4 files):
- elife_poa_e60830_figure1_figure_supplement_1.pdf
- elife_poa_e60830_figure_3_figure_supplement_1.pdf
- elife_poa_e60830_figure_6_figure_supplement_1.pdf
- elife_poa_e60830_Transparent_Reporting_File.docx
