# Supplementary figures and images for: Unsupervised changes in core object recognition behavior are predicted by neural plasticity in inferior temporal cortex
Source: eLife journal article supplement (doi:10.7554/elife.60830), 2021-06-11

**A**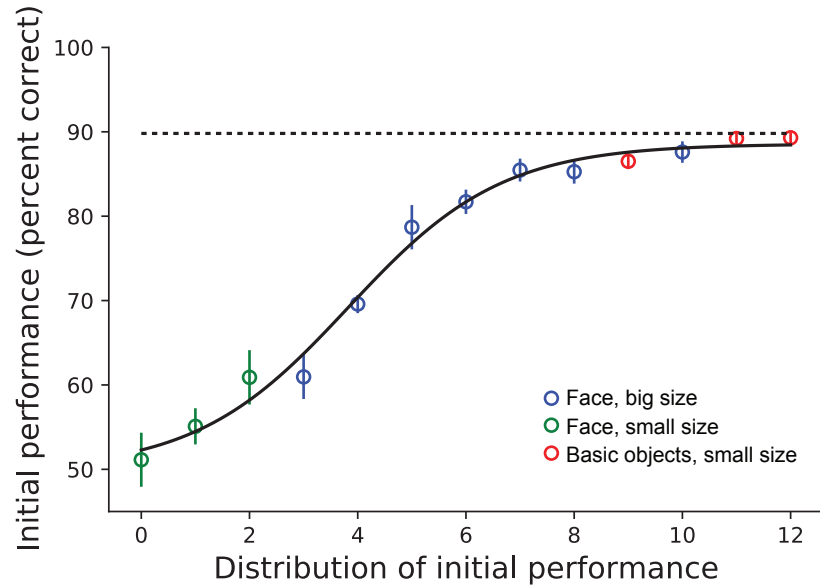**B**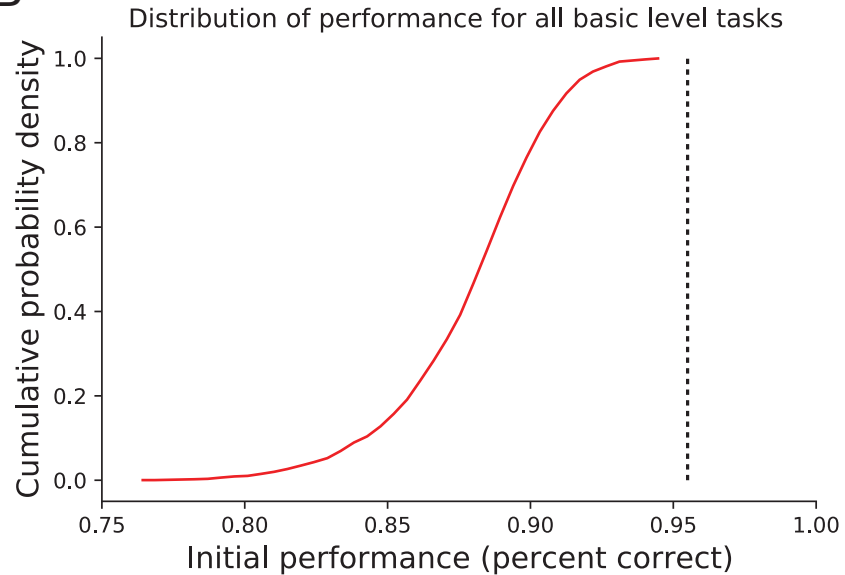

Supplement: supp [file elife-60830-supp-v2.zip]

# A Overall computational model

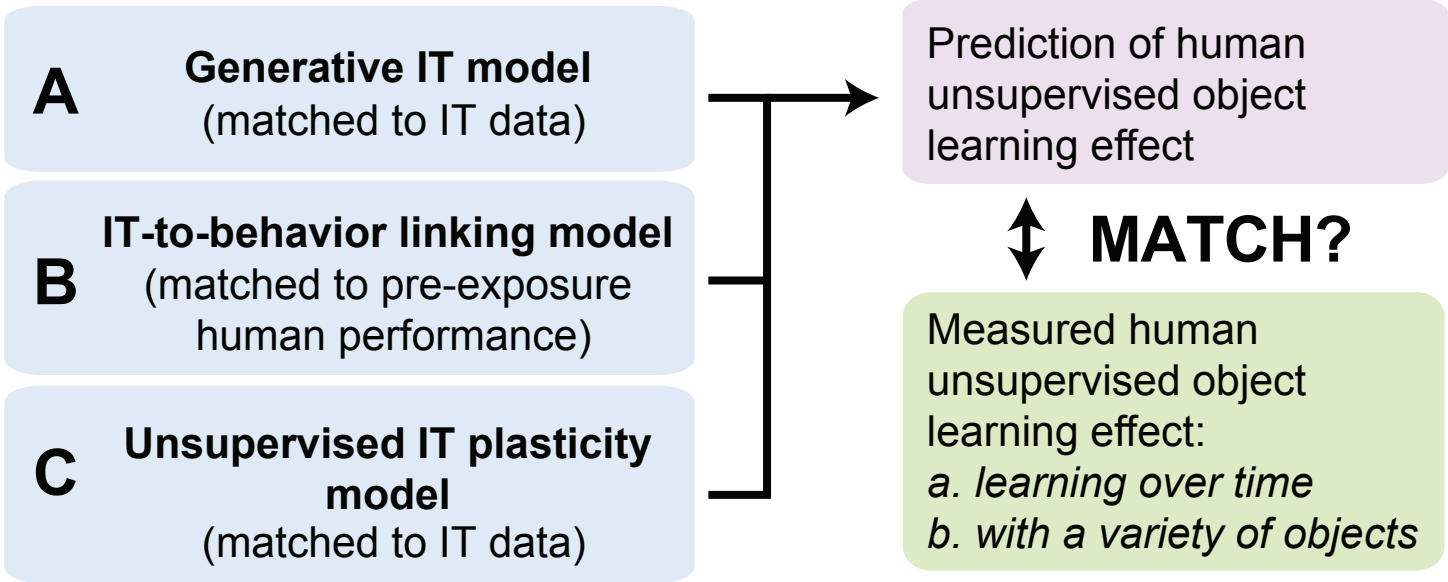

# B Example psychophysical test images

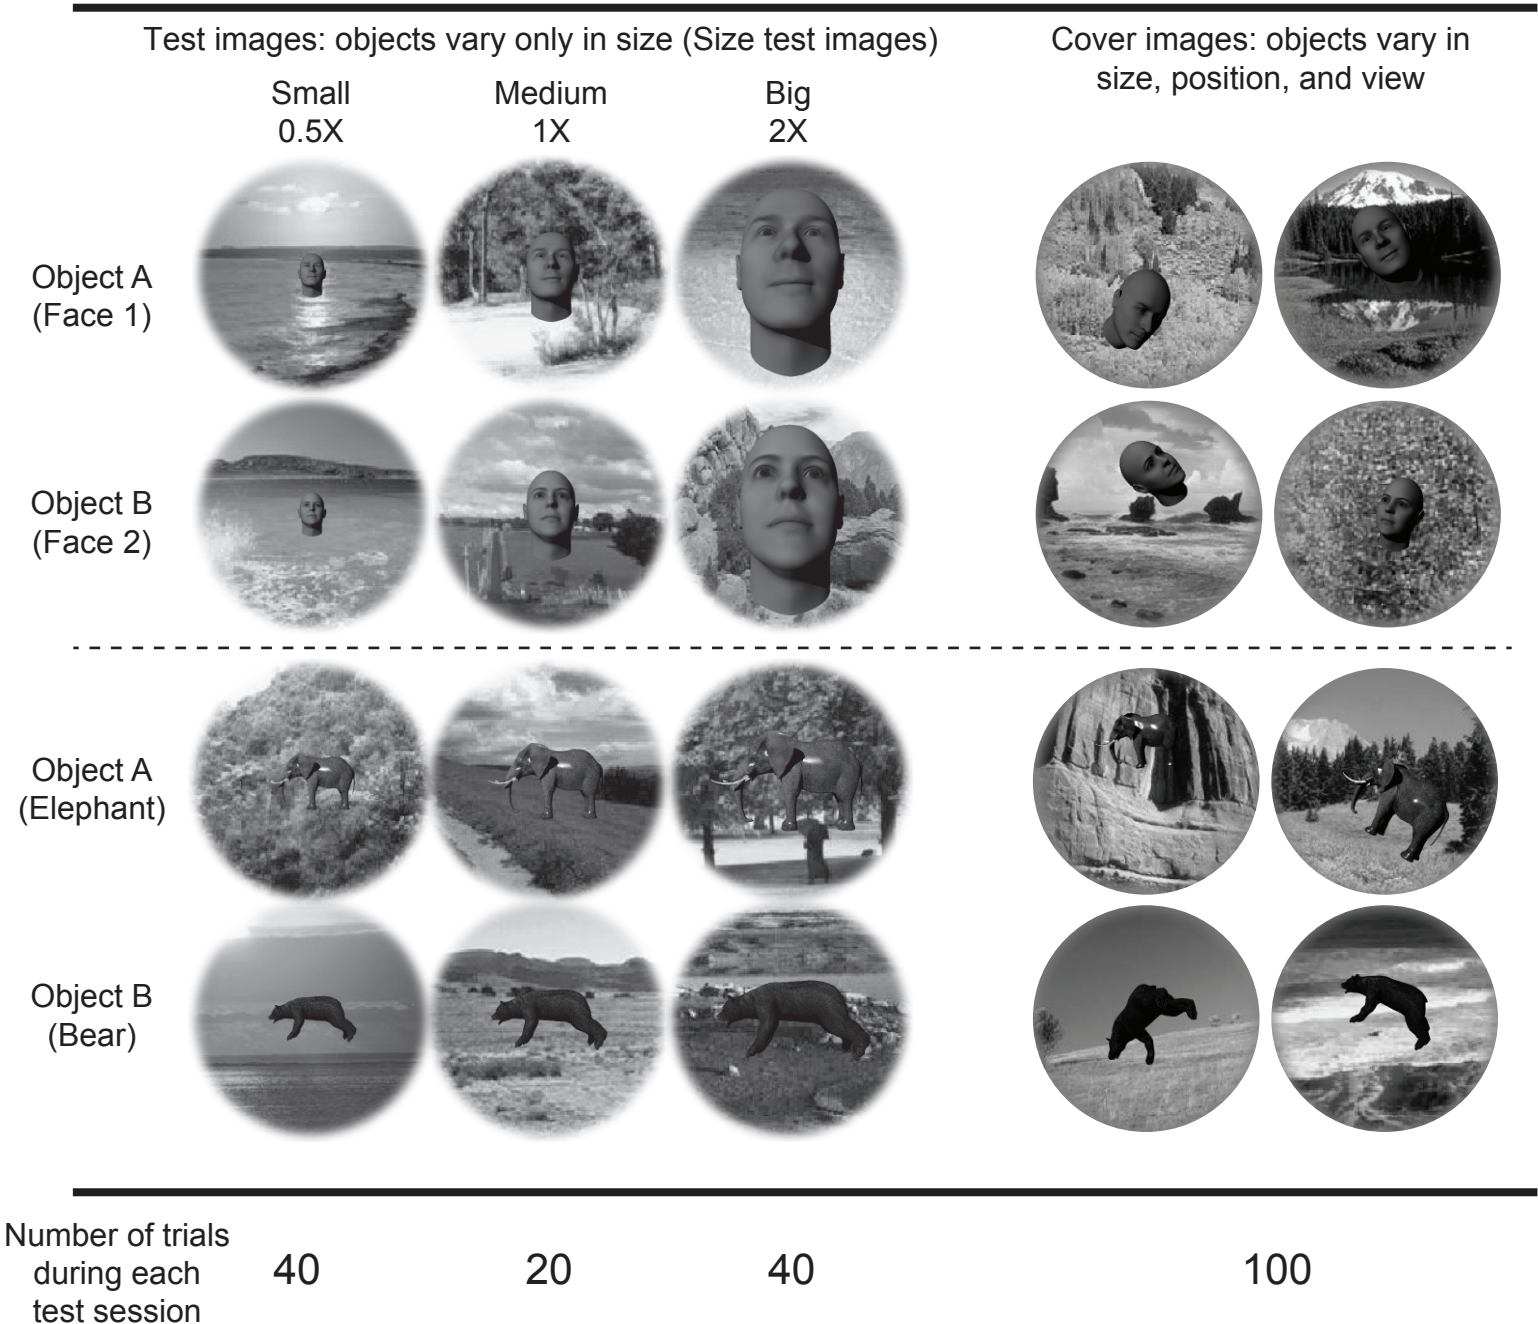

Supplement: supp [file elife-60830-supp-v2.zip › elife_poa_e60830_figure1_figure_supplement_1.pdf]

A

## Example neurons in response to different sizes and objects

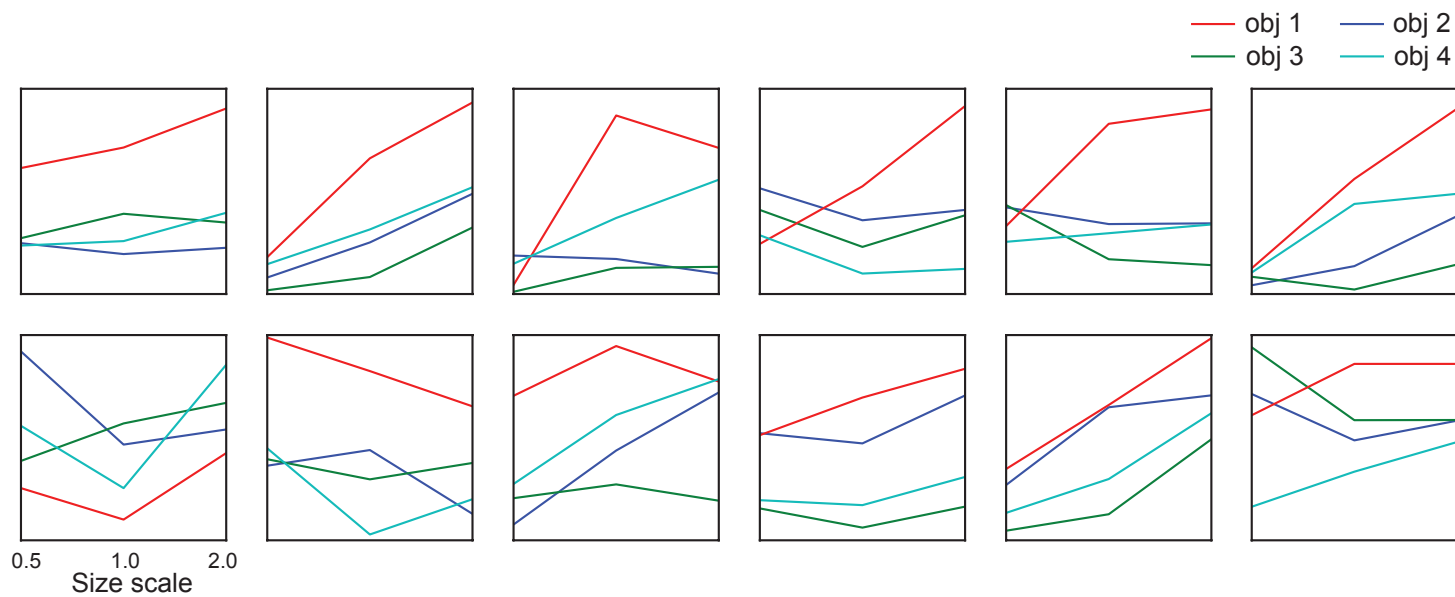

B

## Example size tuning kernels

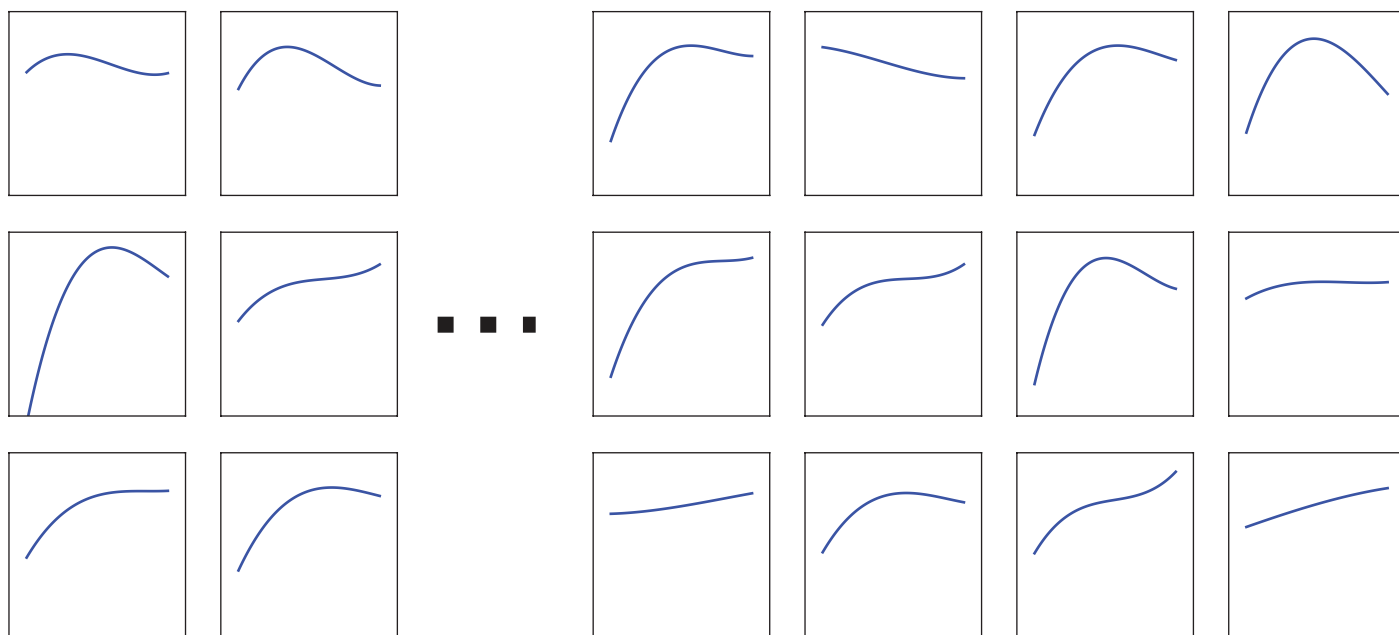

C

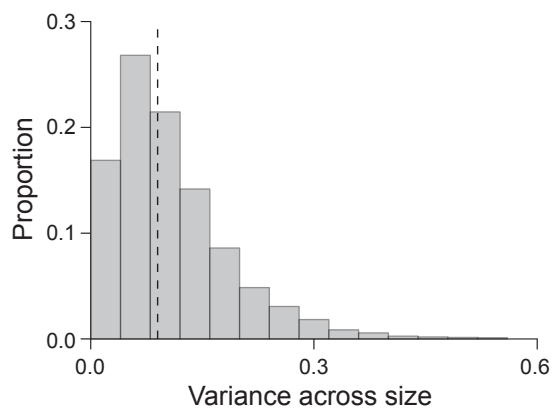

D

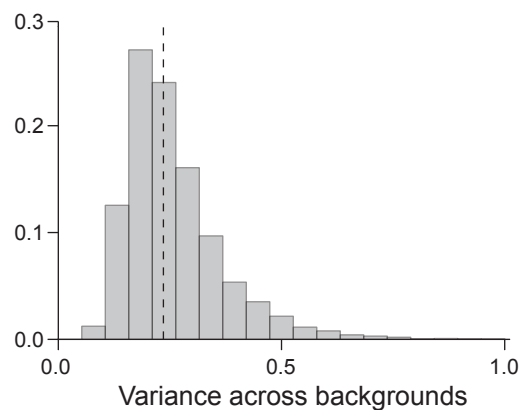

E

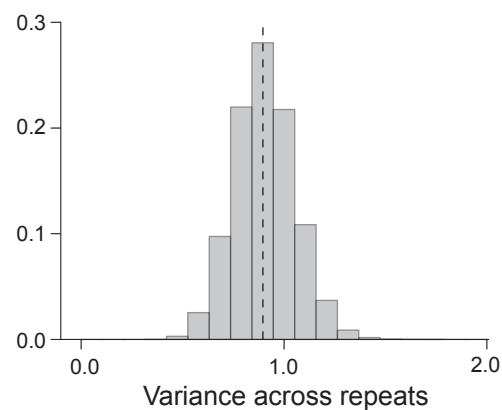

Supplement: supp [file elife-60830-supp-v2.zip › elife_poa_e60830_figure_3_figure_supplement_1.pdf]
